# Supplementary material for: Tracing the Genetic Evolution of Canine Parvovirus Type 2 (CPV-2) in Thailand
Source: MDPI journal article supplement (doi:10.3390/pathogens11121460), 2022-12-02
Supplement: s1 [file s1]

**Supplementary Table S1.** Signalment, date of sample collection, clinical presentation, and vaccination status of the dogs tested positive for CPV-2 isolated from 2018 to 2019.

| Dog ID | Breed               | Collection date (DD/MM/YYYY) | Age (M) | Vaccination status | Clinical presentation    |
|--------|---------------------|------------------------------|---------|--------------------|--------------------------|
| MUT1   | Mixed breed         | 12/12/2018                   | 12      | Unknown            | Vomiting and<br>diarrhea |
| MUT2   | Mixed breed         | 13/12/2018                   | 24      | Unknown            | Diarrhea                 |
| MUT3   | Siberian<br>Husky   | 13/01/2019                   | 6       | Unvaccinated       | Vomiting and<br>diarrhea |
| MUT4   | German<br>Shepherd  | 1/3/2019                     | 2       | Unvaccinated       | Vomiting and<br>diarrhea |
| MUT5   | American<br>Bulldog | 13/02/2018                   | 4       | Unvaccinated       | Vomiting and<br>diarrhea |
| MUT6   | Pomeranian          | 15/03/2018                   | 2       | Unvaccinated       | Vomiting and<br>diarrhea |
| MUT7   | Pomeranian          | 20/04/2018                   | 5       | Unvaccinated       | Vomiting and<br>diarrhea |
| MUT8   | Mixed breed         | 19/06/2018                   | 12      | Unknown            | Diarrhea                 |
| MUT9   | Poodle              | 11/3/2019                    | 3       | Vaccinated         | Diarrhea                 |
| MUT10  | Mixed breed         | 1/4/2019                     | 5       | Vaccinated         | Diarrhea                 |
| MUT11  | American<br>Bulldog | 5/4/2019                     | 4       | Unvaccinated       | Diarrhea                 |
| MUT12  | Pomeranian          | 2/5/2019                     | 3       | Vaccinated         | Diarrhea                 |
| MUT13  | Mixed breed         | 12/5/2019                    | 3       | Vaccinated         | Diarrhea                 |
| MUT14  | Pomeranian          | 22/06/2019                   | 8       | Vaccinated         | Diarrhea                 |
| MUT15  | Mixed breed         | 25/06/2019                   | 3       | Vaccinated         | Diarrhea                 |

**Supplementary Table S2.** The selection criteria of CPV-2 representative sequences.

| CPV-2a representative sequences ( <i>n</i> = 40) |                      |             |      |                                                                                                    |
|--------------------------------------------------|----------------------|-------------|------|----------------------------------------------------------------------------------------------------|
|                                                  | Origin               | Accession # | Year | Inclusion criteria                                                                                 |
| 1                                                | Italy                | KX434462    | 2015 | FPV, an out group                                                                                  |
| 2                                                | China                | GU569943    | 1983 | A representative sequence of the original CPV-2 circulating before 2000                            |
| 3                                                | USA                  | EU659117    | 1980 | A representative sequence of the original CPV-2 circulating before 2000                            |
| 4                                                | USA                  | M19296      | 1979 | A representative sequence of the original CPV-2 circulating before 2000                            |
| 5                                                | Vaccine Nobivac      | FJ197846    | 2007 | A representative sequence of prototype virus                                                       |
| 6                                                | Vaccine Quantum      | GU212792    | 2009 | A representative sequence of prototype virus                                                       |
| 7                                                | VaccineVanguardPlus5 | MW239610    | 2018 | A representative sequence of prototype virus                                                       |
| 8                                                | Vaccine Duramune     | FJ222822    | N/A  | A representative sequence of prototype virus                                                       |
| 9                                                | Vaccine Pfizer       | FJ197847    | 2007 | A representative sequence of prototype virus                                                       |
| 10                                               | USA                  | AY742953    | 2003 | A representative sequence of new CPV-2a (S297A) circulating in North America between 2000 and 2010 |
| 11                                               | USA                  | EU659118    | 1981 | A representative sequence of CPV-2a circulating in North America before 2000                       |
| 12                                               | Italy                | FJ005259    | 2008 | A representative sequence of CPV-2 circulating in Europe between 2000 and 2010                     |
| 13                                               | South Korea          | EF599096    | 2005 | A representative sequence of CPV-2 circulating in Asia between 2000 and 2010                       |
| 14                                               | Vietnam              | AB054215    | 1997 | A representative sequence of CPV-2 circulating in Southeast Asia before 2000                       |
| 15                                               | Vietnam              | AB054217    | 1997 | A representative sequence of CPV-2 circulating in Southeast Asia before 2000                       |
| 16                                               | Vietnam              | MK357724    | 2017 | A representative sequence of CPV-2 circulating in Southeast Asia after 2015                        |
| 17                                               | South Korea          | EU009200    | 2006 | A representative sequence of CPV-2 circulating in Asia between 2000 and 2010                       |
| 18                                               | Canada               | MF423125    | 2014 | A representative sequence of CPV-2a circulating in North America between 2011 and 2015             |
| 19                                               | Italy                | MG434745    | 2017 | A representative sequence new CPV-2a (VP2 324Leu) circulating in Europe after 2015                 |
| 20                                               | Italy                | MG434739    | 2016 | A representative sequence new CPV-2a (VP2 324Leu) circulating in Europe after 2015                 |
| 21                                               | Italy                | MG434741    | 2017 | A representative sequence new CPV-2a (VP2 324Leu) circulating in Europe after 2015                 |

|    |             |          |      |                                                                                        |
|----|-------------|----------|------|----------------------------------------------------------------------------------------|
| 22 | Italy       | FJ005254 | 2005 | A representative sequence of CPV-2 circulating in Europe between 2000 and 2010         |
| 23 | Brazil      | DQ340407 | 1980 | A representative sequence of the CPV-2 circulating in South America before 2000        |
| 24 | China       | DQ354068 | 2004 | A representative sequence of CPV-2 circulating in Asia between 2000 and 2010           |
| 25 | China       | GU569939 | 2002 | A representative sequence of CPV-2 circulating in Asia between 2000 and 2010           |
| 26 | China       | FJ435343 | 2008 | A representative sequence of CPV-2 circulating in Asia between 2000 and 2010           |
| 27 | China       | GU380304 | 2009 | A representative sequence of CPV-2 circulating in Asia between 2000 and 2010           |
| 28 | China       | GU569936 | 2008 | A representative sequence of CPV-2 circulating in Asia between 2000 and 2010           |
| 29 | South Korea | FJ197825 | 2007 | A representative sequence of CPV-2 circulating in Asia between 2000 and 2010           |
| 30 | China       | JQ686671 | 2011 | A representative sequence of CPV-2 circulating in Asia between 2011 and 2015           |
| 31 | China       | JX660690 | 2011 | A representative sequence of CPV-2 circulating in Asia between 2011 and 2015           |
| 32 | Uruguay     | KM457139 | 2011 | A representative sequence of CPV-2 circulating in South America between 2011 and 2015  |
| 33 | Uruguay     | JF906788 | 2010 | A representative sequence of CPV-2 circulating in South America between 2000 and 2010  |
| 34 | Uruguay     | KM457141 | 2011 | A representative sequence of CPV-2 circulating in South America between 2011 and 2015  |
| 35 | China       | MF467224 | 2015 | A representative sequence of CPV-2 circulating in Asia between 2011 and 2015           |
| 36 | India       | KX469433 | 2015 | A representative sequence of CPV-2 circulating in Asia between 2011 and 2015           |
| 37 | India       | KX219736 | 2012 | A representative sequence of CPV-2 circulating in Asia between 2011 and 2015           |
| 38 | Singapore   | KY083098 | 2014 | A representative sequence of CPV-2 circulating in Southeast Asia between 2011 and 2015 |
| 39 | Vietnam     | MT106238 | 2017 | A representative sequence of CPV-2 circulating in Southeast Asia after 2015            |
| 40 | Vietnam     | LC214970 | 2013 | A representative sequence of CPV-2 circulating in Southeast Asia between 2011 and 2015 |

| CPV-2b representative sequences ( <i>n</i> = 34) |                 |             |      |                                                                                        |
|--------------------------------------------------|-----------------|-------------|------|----------------------------------------------------------------------------------------|
|                                                  | Origin          | Accession # | Year | Inclusion criteria                                                                     |
| 1                                                | VaccineDuramune | FJ222822    | N/A  | A representative sequence of prototype virus                                           |
| 2                                                | USA             | JX475261    | 2010 | A representative sequence of CPV-2b circulating in North America between 2000 and 2010 |

|    |          |          |      |                                                                                          |
|----|----------|----------|------|------------------------------------------------------------------------------------------|
| 3  | Italy    | FJ005263 | 2005 | A representative sequence of CPV-2b circulating in Europe between 2000 and 2010          |
| 4  | Germany  | FJ005260 | 1997 | A representative sequence of CPV-2b circulating in Europe before 2000                    |
| 5  | Brazil   | MF177251 | 2013 | A representative sequence of CPV-2b circulating in South America between 2011 and 2015   |
| 6  | Brazil   | EU659120 | 1998 | A representative sequence of CPV-2b circulating in South America before 2000             |
| 7  | Ecuador  | MF177280 | 2011 | A representative sequence of CPV-2b circulating in South America between 2011 and 2015   |
| 8  | Portugal | KR559895 | 2013 | A representative sequence of CPV-2b circulating in Europe between 2011 and 2015          |
| 9  | Vietnam  | AB120723 | 2002 | A representative sequence of CPV-2b circulating in Southeast Asia between 2000 and 2010  |
| 10 | Vietnam  | AB054219 | 1997 | A representative sequence of CPV-2b circulating in Southeast Asia before 2000            |
| 11 | Vietnam  | AB054220 | 1997 | A representative sequence of CPV-2b circulating in Southeast Asia before 2000            |
| 12 | USA      | EU659121 | 1998 | A representative sequence of new CPV-2b (S297A) circulating in North America before 2000 |
| 13 | India    | KX469430 | 2010 | A representative sequence of CPV-2b circulating in Asia between 2000 and 2010            |
| 14 | Vietnam  | AB120724 | 2002 | A representative sequence of CPV-2b circulating in Southeast Asia between 2000 and 2010  |
| 15 | India    | KX425921 | 2010 | A representative sequence of new CPV-2b (S297) circulating in Asia between 2000 and 2010 |
| 16 | Taiwan   | KU244254 | 2015 | A representative sequence of CPV-2b circulating in Asia between 2011 and 2015            |
| 17 | Taiwan   | JX048607 | 2011 | A representative sequence of CPV-2b circulating in Asia between 2011 and 2015            |
| 18 | China    | KY937668 | 2016 | A representative sequence of CPV-2b circulating in Asia after 2015                       |
| 19 | China    | KR611492 | 2014 | A representative sequence of CPV-2b circulating in Asia between 2011 and 2015            |
| 20 | China    | JQ743891 | 2010 | A representative sequence of CPV-2b circulating in Asia between 2011 and 2015            |
| 21 | China    | KY937657 | 2016 | A representative sequence of CPV-2b circulating in Asia after 2015                       |
| 22 | China    | JQ268284 | 2011 | A representative sequence of new CPV-2b circulating in Asia between 2011 and 2015        |
| 23 | Italy    | KX434462 | 2015 | FPV, an out group                                                                        |
| 24 | China    | GU569943 | 1983 | A representative sequence of CPV-2b circulating in Asia before 2000                      |
| 25 | USA      | EU659117 | 1980 | A representative sequence of prototype virus circulating before 2000                     |

| 26                                               | USA                  | M19296      | 1979 | A representative sequence of prototype virus circulating before 2000                   |
|--------------------------------------------------|----------------------|-------------|------|----------------------------------------------------------------------------------------|
| 27                                               | VaccineNobivac       | FJ197846    | 2007 | A representative sequence of prototype virus                                           |
| 28                                               | VaccineQuantum       | GU212792    | 2009 | A representative sequence of prototype virus                                           |
| 29                                               | VaccineVanguardPlus5 | MW239610    | 2018 | A representative sequence of prototype virus                                           |
| 30                                               | VaccinePfizer        | FJ197847    | 2007 | A representative sequence of prototype virus                                           |
| 31                                               | Italy                | MF177226    | 1999 | A representative sequence of CPV-2b circulating in Europe before 2000                  |
| 32                                               | Argentina            | JF414817    | 2003 | A representative sequence of CPV-2b circulating in South America between 2000 and 2010 |
| 33                                               | Chile                | MT585713    | 2019 | A representative sequence of CPV-2b circulating in South America after 2015            |
| 34                                               | Vietnam              | AB054221    | 1997 | A representative sequence of CPV-2b circulating in Southeast Asia before 2000          |
| CPV-2c representative sequences ( <i>n</i> = 29) |                      |             |      |                                                                                        |
|                                                  | Origin               | Accession # | Year | Inclusion criteria                                                                     |
| 1                                                | Italy                | KX434462    | 2015 | FPV, an out group                                                                      |
| 2                                                | China                | GU569943    | 1983 | A representative sequence of the original CPV-2 circulating in Asia before 2000        |
| 3                                                | USA                  | EU659117    | 1980 | A representative sequence of prototype virus circulating before 2000                   |
| 4                                                | USA                  | M19296      | 1979 | A representative sequence of prototype virus circulating before 2000                   |
| 5                                                | VaccineNobivac       | FJ197846    | 2007 | A representative sequence of prototype virus                                           |
| 6                                                | VaccineQuantum       | GU212792    | 2009 | A representative sequence of prototype virus                                           |
| 7                                                | VaccineVanguardPlus5 | MW239610    | 2018 | A representative sequence of prototype virus                                           |
| 8                                                | VaccineDuramune      | FJ222822    | N/A  | A representative sequence of prototype virus                                           |
| 9                                                | VaccinePfizer        | FJ197847    | 2007 | A representative sequence of prototype virus                                           |
| 10                                               | Italy                | FJ222821    | 2000 | A representative sequence of the original CPV-2c (Western clade)                       |
| 11                                               | Italy                | MF177239    | 2001 | A representative sequence of CPV-2c (Western clade) circulating between 2000 and 2010  |
| 12                                               | Italy                | KX434458    | 2011 | A representative sequence of CPV-2c (Western clade) circulating between 2011 and 2015  |
| 13                                               | Australia            | KU508692    | 2015 | A representative sequence of CPV-2c (Western clade) circulating between 2011 and 2015  |
| 14                                               | Spain                | FJ005214    | 2006 | A representative sequence of CPV-2c (Western clade) circulating between 2000 and 2010  |

|    |           |          |      |                                                                                                       |
|----|-----------|----------|------|-------------------------------------------------------------------------------------------------------|
| 15 | France    | DQ025951 | 2008 | A representative sequence of CPV-2c (Western clade) circulating between 2000 and 2010                 |
| 16 | Germany   | FJ005196 | 1997 | A representative sequence of CPV-2c (Western clade) circulating before 2000                           |
| 17 | Argentina | MF177243 | 2008 | A representative sequence of CPV-2c (Western clade) circulating between 2000 and 2010                 |
| 18 | Uruguay   | KM457117 | 2009 | A representative sequence of CPV-2c (Western clade) circulating between 2000 and 2010                 |
| 19 | Brazil    | MK344453 | 2015 | A representative sequence of CPV-2c (Western clade) circulating between 2010 and 2015                 |
| 20 | Vietnam   | MW239593 | 2019 | A representative sequence of CPV-2c (Asian clade) circulating in Southeast Asia after 2015            |
| 21 | Vietnam   | MT106228 | 2017 | A representative sequence of CPV-2c (Asian clade) circulating in Southeast Asia after 2015            |
| 22 | Vietnam   | LC216906 | 2013 | A representative sequence of CPV-2c (Asian clade) circulating in Southeast Asia between 2010 and 2015 |
| 23 | Vietnam   | MW239583 | 2018 | A representative sequence of CPV-2c (Asian clade) circulating in Southeast Asia after 2015            |
| 24 | Taiwan    | MN832850 | 2018 | A representative sequence of CPV-2c (Asian clade) circulating in Asia after 2015                      |
| 25 | Vietnam   | MT106231 | 2017 | A representative sequence of CPV-2c (Asian clade) circulating in Southeast Asia after 2015            |
| 26 | Vietnam   | MK357731 | 2017 | A representative sequence of CPV-2c (Asian clade) circulating in Southeast Asia after 2015            |
| 27 | Vietnam   | MK357737 | 2018 | A representative sequence of CPV-2c (Asian clade) circulating in Southeast Asia after 2015            |
| 28 | Vietnam   | MW239585 | 2019 | A representative sequence of CPV-2c (Asian clade) circulating in Southeast Asia after 2015            |
| 29 | Vietnam   | MW239608 | 2019 | A representative sequence of CPV-2c (Asian clade) circulating in Southeast Asia after 2015            |

**Supplementary Table S3.** The percentages of Thai CPV-2 variants between 2003 and 2019.

| Years | CPV-2 variants (%) |        |        |
|-------|--------------------|--------|--------|
|       | CPV-2a             | CPV-2b | CPV-2c |
| 2003  | 50                 | 50     | 0      |
| 2004  | 88                 | 13     | 0      |

|      |     |    |     |
|------|-----|----|-----|
| 2008 | 57  | 43 | 0   |
| 2009 | 100 | 0  | 0   |
| 2010 | 48  | 52 | 0   |
| 2014 | 0   | 0  | 100 |
| 2016 | 52  | 3  | 45  |
| 2017 | 43  | 3  | 53  |
| 2018 | 41  | 0  | 59  |
| 2019 | 0   | 0  | 100 |

**Supplementary Table S4.** The numbers and percentages of Thai CPV-2a variant based on VP2 amino acid mutation patterns.

| CPV-2a mutation pattern |                | Year |      |      |      |      |      |              |
|-------------------------|----------------|------|------|------|------|------|------|--------------|
|                         |                | 2003 | 2004 | 2008 | 2009 | 2010 | 2018 | 2003 to 2018 |
| No mutation             | Number         | 3    | 7    | 1    | 0    | 0    | 0    | 11           |
|                         | Percentage (%) | 100  | 100  | 25   | 0    | 0    | 0    | 21           |
| 1 mutation              | Number         | 0    | 0    | 0    | 0    | 2    | 0    | 2            |
|                         | Percentage (%) | 0    | 0    | 0    | 0    | 7    | 0    | 4            |
| 2 mutations             | Number         | 0    | 0    | 0    | 0    | 1    | 0    | 1            |
|                         | Percentage (%) | 0    | 0    | 0    | 0    | 3    | 0    | 2            |
| 3 mutations             | Number         | 0    | 0    | 3    | 5    | 25   | 5    | 38           |
|                         | Percentage (%) | 0    | 0    | 75   | 100  | 86   | 100  | 71           |
| 4 mutations             | Number         | 0    | 0    | 0    | 0    | 1    | 0    | 1            |
|                         | Percentage (%) | 0    | 0    | 0    | 0    | 3    | 0    | 2            |

**Supplementary Table S5.** The VP2 amino acid mutation patterns of Thai and representative CPV-2a variants.

| Thai CPV-2a sequences (n=53) |          |             |      |                  |    |     |     |     |
|------------------------------|----------|-------------|------|------------------|----|-----|-----|-----|
|                              | Origin   | Accession # | Year | Mutation Pattern | 80 | 267 | 324 | 440 |
| 1                            | Thailand | FJ869134    | 2003 | No               | R  | F   | Y   | T   |
| 2                            | Thailand | FJ869137    | 2003 | No               | R  | F   | Y   | T   |
| 3                            | Thailand | FJ869138    | 2003 | No               | R  | F   | Y   | T   |
| 4                            | Thailand | FJ869127    | 2004 | No               | R  | F   | Y   | T   |
| 5                            | Thailand | FJ869128    | 2004 | No               | R  | F   | Y   | T   |
| 6                            | Thailand | FJ869129    | 2004 | No               | R  | F   | Y   | T   |
| 7                            | Thailand | FJ869130    | 2004 | No               | R  | F   | Y   | T   |
| 8                            | Thailand | FJ869131    | 2004 | No               | R  | F   | Y   | T   |
| 9                            | Thailand | FJ869132    | 2004 | No               | R  | F   | Y   | T   |
| 10                           | Thailand | FJ869133    | 2004 | No               | R  | F   | Y   | T   |
| 11                           | Thailand | FJ869126    | 2008 | No               | R  | F   | Y   | T   |

|    |          |          |      |        |   |   |   |   |
|----|----------|----------|------|--------|---|---|---|---|
| 12 | Thailand | KP715660 | 2010 | Single | R | F | I | T |
| 13 | Thailand | KP715662 | 2010 | Single | R | F | I | T |
| 14 | Thailand | KP715663 | 2010 | Two    | R | F | I | A |
| 15 | Thailand | GQ379042 | 2008 | Three  | R | Y | I | A |
| 16 | Thailand | GQ379043 | 2008 | Three  | R | Y | I | A |
| 17 | Thailand | GQ379049 | 2008 | Three  | R | Y | I | A |
| 18 | Thailand | GQ379044 | 2009 | Three  | R | Y | I | A |
| 19 | Thailand | GQ379045 | 2009 | Three  | R | Y | I | A |
| 20 | Thailand | GQ379046 | 2009 | Three  | R | Y | I | A |
| 21 | Thailand | GQ379047 | 2009 | Three  | R | Y | I | A |
| 22 | Thailand | GQ379048 | 2009 | Three  | R | Y | I | A |
| 23 | Thailand | KP715679 | 2010 | Three  | R | Y | I | A |
| 24 | Thailand | KP715658 | 2010 | Three  | R | Y | I | A |
| 25 | Thailand | KP715659 | 2010 | Three  | R | Y | I | A |
| 26 | Thailand | KP715661 | 2010 | Three  | R | Y | I | A |
| 27 | Thailand | KP715664 | 2010 | Three  | R | Y | I | A |
| 28 | Thailand | KP715665 | 2010 | Three  | R | Y | I | A |
| 29 | Thailand | KP715666 | 2010 | Three  | R | Y | I | A |
| 30 | Thailand | KP715667 | 2010 | Three  | R | Y | I | A |
| 31 | Thailand | KP715668 | 2010 | Three  | R | Y | I | A |
| 32 | Thailand | KP715669 | 2010 | Three  | R | Y | I | A |
| 33 | Thailand | KP715670 | 2010 | Three  | R | Y | I | A |
| 34 | Thailand | KP715671 | 2010 | Three  | R | Y | I | A |
| 35 | Thailand | KP715673 | 2010 | Three  | R | Y | I | A |
| 36 | Thailand | KP715674 | 2010 | Three  | R | Y | I | A |
| 37 | Thailand | KP715675 | 2010 | Three  | R | Y | I | A |
| 38 | Thailand | KP715676 | 2010 | Three  | R | Y | I | A |
| 39 | Thailand | KP715677 | 2010 | Three  | R | Y | I | A |
| 40 | Thailand | KP715678 | 2010 | Three  | R | Y | I | A |
| 41 | Thailand | KP715680 | 2010 | Three  | R | Y | I | A |
| 42 | Thailand | KP715681 | 2010 | Three  | R | Y | I | A |
| 43 | Thailand | KP715682 | 2010 | Three  | R | Y | I | A |
| 44 | Thailand | KP715683 | 2010 | Three  | R | Y | I | A |
| 45 | Thailand | KP715684 | 2010 | Three  | R | Y | I | A |
| 46 | Thailand | KP715685 | 2010 | Three  | R | Y | I | A |
| 47 | Thailand | KP715686 | 2010 | Three  | R | Y | I | A |
| 48 | Thailand | MN270938 | 2018 | Three  | R | Y | I | A |
| 49 | Thailand | MN270939 | 2018 | Three  | R | Y | I | A |
| 50 | Thailand | MN270940 | 2018 | Three  | R | Y | I | A |
| 51 | Thailand | MN270941 | 2018 | Three  | R | Y | I | A |
| 52 | Thailand | MN270942 | 2018 | Three  | R | Y | I | A |

|                                        |                      |             |      |                  |    |     |     |     |
|----------------------------------------|----------------------|-------------|------|------------------|----|-----|-----|-----|
| 53                                     | Thailand             | KP715672    | 2010 | Four             | T  | Y   | I   | A   |
| CPV-2a representative sequences (n=40) |                      |             |      |                  |    |     |     |     |
|                                        | Origin               | Accession # | Year | Mutation Pattern | 80 | 267 | 324 | 440 |
| 1                                      | Italy                | KX434462    | 2015 | N/A (FPV)        | K  | F   | Y   | T   |
| 2                                      | China                | GU569943    | 1983 | No               | R  | F   | Y   | T   |
| 3                                      | USA                  | EU659117    | 1980 | No               | R  | F   | Y   | T   |
| 4                                      | USA                  | M19296      | 1979 | No               | R  | F   | Y   | T   |
| 5                                      | VaccineNobivac       | FJ197846    | 2007 | No               | R  | F   | Y   | T   |
| 6                                      | VaccineQuantum       | GU212792    | 2009 | No               | R  | F   | Y   | T   |
| 7                                      | VaccineVanguardPlus5 | MW239610    | 2018 | No               | R  | F   | Y   | T   |
| 8                                      | VaccineDuramune      | FJ222822    | N/A  | No               | R  | F   | Y   | T   |
| 9                                      | VaccinePfizer        | FJ197847    | 2007 | No               | R  | F   | Y   | T   |
| 10                                     | USA                  | AY742953    | 2003 | No               | R  | F   | Y   | T   |
| 11                                     | USA                  | EU659118    | 1981 | No               | R  | F   | Y   | T   |
| 12                                     | Italy                | FJ005259    | 2008 | No               | R  | F   | Y   | T   |
| 13                                     | South Korea          | EF599096    | 2005 | No               | R  | F   | Y   | T   |
| 14                                     | Vietnam              | AB054215    | 1997 | No               | R  | F   | Y   | T   |
| 15                                     | Vietnam              | AB054217    | 1997 | No               | R  | F   | Y   | T   |
| 16                                     | Vietnam              | MK357724    | 2017 | No               | R  | F   | Y   | T   |
| 17                                     | South Korea          | EU009200    | 2006 | Single           | R  | F   | Y   | A   |
| 18                                     | Canada               | MF423125    | 2014 | Single           | R  | F   | I   | T   |
| 19                                     | Italy                | MG434745    | 2017 | Single           | R  | F   | I   | T   |
| 20                                     | Italy                | MG434739    | 2016 | Single           | R  | F   | I   | T   |
| 21                                     | Italy                | MG434741    | 2017 | Single           | R  | F   | I   | T   |
| 22                                     | Italy                | FJ005254    | 2005 | Single           | R  | F   | Y   | A   |
| 23                                     | Brazil               | DQ340407    | 1980 | Single           | R  | F   | I   | T   |
| 24                                     | China                | DQ354068    | 2004 | Single           | R  | F   | I   | T   |
| 25                                     | China                | GU569939    | 2002 | Single           | R  | F   | I   | T   |
| 26                                     | China                | FJ435343    | 2008 | Single           | R  | F   | I   | T   |
| 27                                     | China                | GU380304    | 2009 | Single           | R  | F   | I   | T   |
| 28                                     | China                | GU569936    | 2008 | Single           | R  | F   | I   | T   |
| 29                                     | South Korea          | FJ197825    | 2007 | Single           | R  | F   | Y   | A   |
| 30                                     | China                | JQ686671    | 2011 | Three            | R  | Y   | I   | A   |
| 31                                     | China                | JX660690    | 2011 | Three            | R  | Y   | I   | A   |
| 32                                     | Uruguay              | KM457139    | 2011 | Three            | R  | Y   | I   | A   |
| 33                                     | Uruguay              | JF906788    | 2010 | Three            | R  | Y   | I   | A   |
| 34                                     | Uruguay              | KM457141    | 2011 | Three            | R  | Y   | I   | A   |
| 35                                     | China                | MF467224    | 2015 | Three            | R  | Y   | I   | A   |
| 36                                     | India                | KX469433    | 2015 | Three            | R  | Y   | I   | A   |
| 37                                     | India                | KX219736    | 2012 | Three            | R  | Y   | I   | A   |
| 38                                     | Singapore            | KY083098    | 2014 | Three            | R  | Y   | I   | A   |

|    |         |          |      |       |   |   |   |   |
|----|---------|----------|------|-------|---|---|---|---|
| 39 | Vietnam | MT106238 | 2017 | Three | R | Y | I | A |
| 40 | Vietnam | LC214970 | 2013 | Three | R | Y | I | A |

**Supplementary Table S6.** The VP2 nucleotide mutations of 2018 Thai CPV-2a isolates.

| Amino acid position  |                              | 80  |     |     | 267 | 324 |     | 440  |      |
|----------------------|------------------------------|-----|-----|-----|-----|-----|-----|------|------|
| Nucleotide position  |                              | 238 | 239 | 240 | 800 | 970 | 971 | 1318 | 1320 |
| Reference nucleotide |                              | A   | A   | A   | T   | T   | A   | A    | A    |
| 1                    | CPV2a/Thailand/MN270938/2018 | C   | G   | T   | A   | A   | T   | G    | G    |
| 2                    | CPV2a/Thailand/MN270939/2018 | C   | G   | T   | A   | A   | T   | G    | G    |
| 3                    | CPV2a/Thailand/MN270940/2018 | C   | G   | T   | A   | A   | T   | G    | G    |
| 4                    | CPV2a/Thailand/MN270941/2018 | C   | G   | T   | A   | A   | T   | G    | G    |
| 5                    | CPV2a/Thailand/MN270942/2018 | C   | G   | T   | A   | A   | T   | G    | G    |

**Supplementary Table S7.** The numbers and percentages of Thai CPV-2b variant based on VP2 amino acid mutation patterns.

| CPV-2b mutation pattern |                | Year |      |      |      |              |
|-------------------------|----------------|------|------|------|------|--------------|
|                         |                | 2003 | 2004 | 2008 | 2010 | 2003 to 2009 |
| No mutation             | Number         | 3    | 1    | 3    | 0    | 7            |
|                         | Percentage (%) | 100  | 100  | 100  | 0    | 18           |
| 1 mutation              | Number         | 0    | 0    | 0    | 1    | 1            |
|                         | Percentage (%) | 0    | 0    | 0    | 3    | 3            |
| 2 mutations             | Number         | 0    | 0    | 0    | 27   | 27           |
|                         | Percentage (%) | 0    | 0    | 0    | 87   | 71           |
| 3 mutations             | Number         | 0    | 0    | 0    | 3    | 3            |
|                         | Percentage (%) | 0    | 0    | 0    | 10   | 8            |

**Supplementary Table S8.** The VP2 amino acid mutation patterns of Thai and representative CPV-2b variants.

| Thai CPV-2b sequences (n=38) |          |             |      |                 |                  |     |     |     |     |
|------------------------------|----------|-------------|------|-----------------|------------------|-----|-----|-----|-----|
| Origin                       |          | Accession # | Year | Original CPV-2b | Mutation Pattern | 267 | 297 | 324 | 440 |
| 1                            | Thailand | FJ869135    | 2003 | No              | No               | F   | A   | Y   | T   |
| 2                            | Thailand | FJ869139    | 2003 | No              | No               | F   | A   | Y   | T   |
| 3                            | Thailand | FJ869165    | 2003 | No              | No               | F   | A   | Y   | T   |
| 4                            | Thailand | FJ869125    | 2004 | No              | No               | F   | A   | Y   | T   |
| 5                            | Thailand | FJ869122    | 2008 | No              | No               | F   | A   | Y   | T   |
| 6                            | Thailand | FJ869123    | 2008 | No              | No               | F   | A   | Y   | T   |
| 7                            | Thailand | FJ869124    | 2008 | No              | No               | F   | A   | Y   | T   |
| 8                            | Thailand | KP715695    | 2010 | No              | Single           | Y   | A   | Y   | T   |

| 9                                      | Thailand        | KP715687    | 2010 | No              | Two              | Y   | A   | I   | T   |
|----------------------------------------|-----------------|-------------|------|-----------------|------------------|-----|-----|-----|-----|
| 10                                     | Thailand        | KP715688    | 2010 | No              | Two              | Y   | A   | I   | T   |
| 11                                     | Thailand        | KP715689    | 2010 | No              | Two              | Y   | A   | I   | T   |
| 12                                     | Thailand        | KP715690    | 2010 | No              | Two              | Y   | A   | I   | T   |
| 13                                     | Thailand        | KP715691    | 2010 | No              | Two              | Y   | A   | I   | T   |
| 14                                     | Thailand        | KP715692    | 2010 | No              | Two              | Y   | A   | I   | T   |
| 15                                     | Thailand        | KP715694    | 2010 | No              | Two              | Y   | A   | I   | T   |
| 16                                     | Thailand        | KP715696    | 2010 | No              | Two              | Y   | A   | I   | T   |
| 17                                     | Thailand        | KP715697    | 2010 | No              | Two              | Y   | A   | I   | T   |
| 18                                     | Thailand        | KP715698    | 2010 | No              | Two              | Y   | A   | I   | T   |
| 19                                     | Thailand        | KP715699    | 2010 | No              | Two              | Y   | A   | I   | T   |
| 20                                     | Thailand        | KP715700    | 2010 | No              | Two              | Y   | A   | I   | T   |
| 21                                     | Thailand        | KP715701    | 2010 | No              | Two              | Y   | A   | I   | T   |
| 22                                     | Thailand        | KP715702    | 2010 | No              | Two              | Y   | A   | I   | T   |
| 23                                     | Thailand        | KP715703    | 2010 | No              | Two              | Y   | A   | I   | T   |
| 24                                     | Thailand        | KP715704    | 2010 | No              | Two              | Y   | A   | I   | T   |
| 25                                     | Thailand        | KP715705    | 2010 | No              | Two              | Y   | A   | I   | T   |
| 26                                     | Thailand        | KP715706    | 2010 | No              | Two              | Y   | A   | I   | T   |
| 27                                     | Thailand        | KP715707    | 2010 | No              | Two              | Y   | A   | I   | T   |
| 28                                     | Thailand        | KP715709    | 2010 | No              | Two              | Y   | A   | I   | T   |
| 29                                     | Thailand        | KP715710    | 2010 | No              | Two              | Y   | A   | I   | T   |
| 30                                     | Thailand        | KP715711    | 2010 | No              | Two              | Y   | A   | I   | T   |
| 31                                     | Thailand        | KP715712    | 2010 | No              | Two              | Y   | A   | I   | T   |
| 32                                     | Thailand        | KP715713    | 2010 | No              | Two              | Y   | A   | I   | T   |
| 33                                     | Thailand        | KP715714    | 2010 | No              | Two              | Y   | A   | I   | T   |
| 34                                     | Thailand        | KP715715    | 2010 | No              | Two              | Y   | A   | I   | T   |
| 35                                     | Thailand        | KP715716    | 2010 | No              | Two              | Y   | A   | I   | T   |
| 36                                     | Thailand        | KP715693    | 2010 | No              | Three            | Y   | A   | I   | A   |
| 37                                     | Thailand        | KP715708    | 2010 | No              | Three            | Y   | A   | I   | A   |
| 38                                     | Thailand        | KP715717    | 2010 | No              | Three            | Y   | A   | I   | A   |
| CPV-2b representative sequences (n=34) |                 |             |      |                 |                  |     |     |     |     |
| Origin                                 |                 | Accession # | Year | Original CPV-2b | Mutation Pattern | 267 | 297 | 324 | 440 |
| 1                                      | VaccineDuramune | FJ222822    | N/A  | No              | No               | F   | A   | Y   | T   |
| 2                                      | USA             | JX475261    | 2010 | No              | No               | F   | A   | Y   | T   |
| 3                                      | Italy           | FJ005263    | 2005 | No              | No               | F   | A   | Y   | T   |
| 4                                      | Germany         | FJ005260    | 1997 | No              | No               | F   | A   | Y   | T   |
| 5                                      | Brazil          | MF177251    | 2013 | No              | No               | F   | A   | Y   | T   |
| 6                                      | Brazil          | EU659120    | 1998 | No              | No               | F   | A   | Y   | T   |
| 7                                      | Ecuador         | MF177280    | 2011 | No              | No               | F   | A   | Y   | T   |
| 8                                      | Portugal        | KR559895    | 2013 | No              | No               | F   | A   | Y   | T   |
| 9                                      | Vietnam         | AB120723    | 2002 | No              | No               | F   | A   | Y   | T   |
| 10                                     | Vietnam         | AB054219    | 1997 | No              | No               | F   | A   | Y   | T   |

|    |                      |          |      |           |        |   |   |   |   |
|----|----------------------|----------|------|-----------|--------|---|---|---|---|
| 11 | Vietnam              | AB054220 | 1997 | No        | No     | F | A | Y | T |
| 12 | USA                  | EU659121 | 1998 | No        | No     | F | A | Y | T |
| 13 | India                | KX469430 | 2010 | No        | Single | Y | A | Y | T |
| 14 | Vietnam              | AB120724 | 2002 | No        | Single | Y | A | Y | T |
| 15 | India                | KX425921 | 2010 | No        | Single | Y | A | Y | T |
| 16 | Taiwan               | KU244254 | 2015 | No        | Two    | Y | A | I | T |
| 17 | Taiwan               | JX048607 | 2011 | No        | Three  | Y | A | I | A |
| 18 | China                | KY937668 | 2016 | No        | Three  | Y | A | I | A |
| 19 | China                | KR611492 | 2014 | No        | Three  | Y | A | I | A |
| 20 | China                | JQ743891 | 2010 | No        | Three  | Y | A | I | A |
| 21 | China                | KY937657 | 2016 | No        | Three  | Y | A | I | A |
| 22 | China                | JQ268284 | 2011 | No        | Three  | Y | A | I | A |
| 23 | Italy                | KX434462 | 2015 | N/A (FPV) | No     | F | S | Y | T |
| 24 | China                | GU569943 | 1983 | Yes       | No     | F | S | Y | T |
| 25 | USA                  | EU659117 | 1980 | Yes       | No     | F | S | Y | T |
| 26 | USA                  | M19296   | 1979 | Yes       | No     | F | S | Y | T |
| 27 | VaccineNobivac       | FJ197846 | 2007 | Yes       | No     | F | S | Y | T |
| 28 | VaccineQuantum       | GU212792 | 2009 | Yes       | No     | F | S | Y | T |
| 29 | VaccineVanguardPlus5 | MW239610 | 2018 | Yes       | No     | F | S | Y | T |
| 30 | VaccinePfizer        | FJ197847 | 2007 | Yes       | No     | F | S | Y | T |
| 31 | Italy                | MF177226 | 1999 | Yes       | No     | F | S | Y | T |
| 32 | Argentina            | JF414817 | 2003 | N/A       | No     | F | N | Y | T |
| 33 | Chile                | MT585713 | 2019 | N/A       | Single | F | N | I | T |
| 34 | Vietnam              | AB054221 | 1997 | No        | Single | F | A | Y | A |

**Supplementary Table S9.** The numbers and percentages of CPV-2c variants based on VP2 amino acid mutation patterns.

| CPV-2c mutation pattern |                | Year |      |      |              |
|-------------------------|----------------|------|------|------|--------------|
|                         |                | 2016 | 2018 | 2019 | 2016 to 2019 |
| No mutation             | Number         | 0    | 19   | 0    | 19           |
|                         | Percentage (%) | 0    | 100  | 0    | 65           |
| 1 mutation              | Number         | 2    | 1    | 1    | 4            |
|                         | Percentage (%) | 86   | 5    | 9    | 14           |
| 2 mutations             | Number         | 0    | 2    | 4    | 6            |
|                         | Percentage (%) | 0    | 20   | 80   | 21           |

**Supplementary Table S10.** The VP2 amino acid mutation patterns of Thai CPV-2c and representative CPV-2c variants.

| Thai CPV-2c sequences (n=29) |             |      |                  |   |     |
|------------------------------|-------------|------|------------------|---|-----|
| Origin                       | Accession # | Year | Mutation Pattern | 5 | 447 |

|    |          |          |      |        |   |   |
|----|----------|----------|------|--------|---|---|
| 1  | Thailand | MN270943 | 2018 | No     | A | I |
| 2  | Thailand | MN270944 | 2018 | No     | A | I |
| 3  | Thailand | MN270945 | 2018 | No     | A | I |
| 4  | Thailand | MN270946 | 2018 | No     | A | I |
| 5  | Thailand | MN270947 | 2018 | No     | A | I |
| 6  | Thailand | MN270948 | 2018 | No     | A | I |
| 7  | Thailand | MN270949 | 2018 | No     | A | I |
| 8  | Thailand | MN270950 | 2018 | No     | A | I |
| 9  | Thailand | MN270951 | 2018 | No     | A | I |
| 10 | Thailand | MN270952 | 2018 | No     | A | I |
| 11 | Thailand | MN270953 | 2018 | No     | A | I |
| 12 | Thailand | MN270954 | 2018 | No     | A | I |
| 13 | Thailand | MN270955 | 2018 | No     | A | I |
| 14 | Thailand | MN270956 | 2018 | No     | A | I |
| 15 | Thailand | MN270957 | 2018 | No     | A | I |
| 16 | Thailand | MN270958 | 2018 | No     | A | I |
| 17 | Thailand | MN270959 | 2018 | No     | A | I |
| 18 | Thailand | MN270960 | 2018 | No     | A | I |
| 19 | Thailand | MN270961 | 2018 | No     | A | I |
| 20 | Thailand | MH711894 | 2016 | Single | G | I |
| 21 | Thailand | MH711902 | 2016 | Single | G | I |
| 22 | Thailand | ON323036 | 2018 | Single | G | I |
| 23 | Thailand | ON323037 | 2019 | Single | G | I |
| 24 | Thailand | ON323038 | 2018 | Two    | G | M |
| 25 | Thailand | ON323039 | 2018 | Two    | G | M |
| 26 | Thailand | ON323040 | 2019 | Two    | G | M |
| 27 | Thailand | ON323041 | 2019 | Two    | G | M |
| 28 | Thailand | ON323042 | 2019 | Two    | G | M |
| 29 | Thailand | ON323043 | 2019 | Two    | G | M |

CPV-2c representative sequences (n=29)

|    | Origin               | Accession # | Year | Mutation Pattern | 5 | 447 |
|----|----------------------|-------------|------|------------------|---|-----|
| 1  | Italy                | KX434462    | 2015 | N/A (FPV)        | A | I   |
| 2  | China                | GU569943    | 1983 | No               | A | I   |
| 3  | USA                  | EU659117    | 1980 | No               | A | I   |
| 4  | USA                  | M19296      | 1979 | No               | A | I   |
| 5  | VaccineNobivac       | FJ197846    | 2007 | No               | A | I   |
| 6  | VaccineQuantum       | GU212792    | 2009 | No               | A | I   |
| 7  | VaccineVanguardPlus5 | MW239610    | 2018 | No               | A | I   |
| 8  | VaccineDuramune      | FJ222822    | N/A  | No               | A | I   |
| 9  | VaccinePfizer        | FJ197847    | 2007 | No               | A | I   |
| 10 | Italy                | FJ222821    | 2000 | No               | A | I   |
| 11 | Italy                | MF177239    | 2001 | No               | A | I   |
| 12 | Italy                | KX434458    | 2011 | No               | A | I   |

|    |           |          |      |        |   |   |
|----|-----------|----------|------|--------|---|---|
| 13 | Australia | KU508692 | 2015 | No     | A | I |
| 14 | Spain     | FJ005214 | 2006 | No     | A | I |
| 15 | France    | DQ025951 | 2008 | No     | A | I |
| 16 | Germany   | FJ005196 | 1997 | No     | A | I |
| 17 | Argentina | MF177243 | 2008 | No     | A | I |
| 18 | Uruguay   | KM457117 | 2009 | No     | A | I |
| 19 | Brazil    | MK344453 | 2015 | No     | A | I |
| 20 | Vietnam   | MW239593 | 2019 | Single | G | I |
| 21 | Vietnam   | MT106228 | 2017 | Single | G | I |
| 22 | Vietnam   | LC216906 | 2013 | Single | G | I |
| 23 | Vietnam   | MW239583 | 2018 | Single | G | I |
| 24 | Taiwan    | MN832850 | 2018 | Single | G | I |
| 25 | Vietnam   | MT106231 | 2017 | Two    | G | M |
| 26 | Vietnam   | MK357731 | 2017 | Two    | G | M |
| 27 | Vietnam   | MK357737 | 2018 | Two    | G | M |
| 28 | Vietnam   | MW239585 | 2019 | Two    | G | M |
| 29 | Vietnam   | MW239608 | 2019 | Two    | G | M |
